# Supplementary material
Source: Copernicus journal article supplement (doi:10.5194/acp-26-8211-2026)
Supplement: Supplementary file 1 [file acp-26-8211-2026-supplement.pdf]

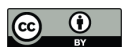

*Supplement of*

## **Liquid-phase reactions of aromatic organosulfates with OH radicals: kinetics, mechanisms, and environmental effects**

**Yu Yang et al.**

*Correspondence to:* Liubin Huang (hliubin@sdu.edu.cn)

The copyright of individual parts of the supplement might differ from the article licence.

**Table S1.** Summary of experiments conducted in this study.

| <b>Exp no.</b> | <b>Aromatic OSs</b>   | <b>Conc. (mM)</b> | <b>BA (mM)</b> | <b>H<sub>2</sub>O<sub>2</sub> (mM)</b> | <b>UV conditions</b> | <b>pH</b> | <b>Method</b> |
|----------------|-----------------------|-------------------|----------------|----------------------------------------|----------------------|-----------|---------------|
| 1              | Phenyl sulfate        | 0.05              | 0.05           | 10                                     | Xe lamp              | 3         | UPLC          |
| 2              | Phenyl sulfate        | 0.05              | 0.05           | 10                                     | Xe lamp              | 8         | UPLC          |
| 3              | Phenyl sulfate        | 0.05              | 0.05           | –                                      | Xe lamp              | 3         | UPLC          |
| 4              | Phenyl sulfate        | 0.05              | 0.05           | –                                      | Xe lamp              | 8         | UPLC          |
| 5              | Phenyl sulfate        | 0.05              | 0.05           | 10                                     | dark                 | 3         | UPLC          |
| 6              | Phenyl sulfate        | 0.05              | 0.05           | 10                                     | dark                 | 8         | UPLC          |
| 7              | Phenyl sulfate        | 0.05              | –              | 10                                     | Xe lamp              | 3         | UPLC-Q-TOF-MS |
| 8              | Phenyl sulfate        | 0.05              | –              | 10                                     | Xe lamp              | 8         | UPLC-Q-TOF-MS |
| 9              | Phenyl sulfate        | 0.05              | –              | 10                                     | dark                 | –         | UPLC-Q-TOF-MS |
| 10             | Phenyl sulfate        | 0.05              | –              | –                                      | –                    | –         | UPLC-Q-TOF-MS |
| 11             | Phenyl sulfate        | 0.5               | –              | 10                                     | Xe lamp              | 3         | UPLC-PAD-MS   |
| 12             | Phenyl sulfate        | 0.5               | –              | 10                                     | Xe lamp              | 8         | UPLC-PAD-MS   |
| 13             | Phenyl sulfate        | 1                 | –              | 10                                     | Xe lamp              | 3         | UV-vis, EEM   |
| 14             | Phenyl sulfate        | 1                 | –              | 10                                     | Xe lamp              | 8         | UV-vis, EEM   |
| 15             | p-Tolyl sulfate       | 0.05              | 0.05           | 10                                     | Xe lamp              | 3         | UPLC          |
| 16             | p-Tolyl sulfate       | 0.05              | 0.05           | 10                                     | Xe lamp              | 8         | UPLC          |
| 17             | p-Tolyl sulfate       | 0.05              | 0.05           | –                                      | Xe lamp              | 3         | UPLC          |
| 18             | p-Tolyl sulfate       | 0.05              | 0.05           | –                                      | Xe lamp              | 8         | UPLC          |
| 19             | p-Tolyl sulfate       | 0.05              | 0.05           | 10                                     | dark                 | 3         | UPLC          |
| 20             | p-Tolyl sulfate       | 0.05              | 0.05           | 10                                     | dark                 | 8         | UPLC          |
| 21             | p-Tolyl sulfate       | 0.05              | –              | 10                                     | Xe lamp              | 3         | UPLC-Q-TOF-MS |
| 22             | p-Tolyl sulfate       | 0.05              | –              | 10                                     | Xe lamp              | 8         | UPLC-Q-TOF-MS |
| 23             | p-Tolyl sulfate       | 0.05              | –              | 10                                     | dark                 | –         | UPLC-Q-TOF-MS |
| 24             | p-Tolyl sulfate       | 0.05              | –              | –                                      | –                    | –         | UPLC-Q-TOF-MS |
| 25             | p-Tolyl sulfate       | 0.5               | –              | 10                                     | Xe lamp              | 3         | UPLC-PAD-MS   |
| 26             | p-Tolyl sulfate       | 0.5               | –              | 10                                     | Xe lamp              | 8         | UPLC-PAD-MS   |
| 27             | p-Tolyl sulfate       | 1                 | –              | 10                                     | Xe lamp              | 3         | UV-vis, EEM   |
| 28             | 4-Ethylphenyl sulfate | 0.05              | 0.05           | 10                                     | Xe lamp              | 3         | UPLC          |
| 29             | 4-Ethylphenyl sulfate | 0.05              | 0.05           | 10                                     | Xe lamp              | 8         | UPLC          |
| 30             | 4-Ethylphenyl sulfate | 0.05              | 0.05           | –                                      | Xe lamp              | 3         | UPLC          |
| 31             | 4-Ethylphenyl sulfate | 0.05              | 0.05           | –                                      | Xe lamp              | 8         | UPLC          |
| 32             | 4-Ethylphenyl sulfate | 0.05              | 0.05           | 10                                     | dark                 | 3         | UPLC          |
| 33             | 4-Ethylphenyl sulfate | 0.05              | 0.05           | 10                                     | dark                 | 8         | UPLC          |
| 34             | 4-Ethylphenyl sulfate | 0.05              | –              | 10                                     | Xe lamp              | 3         | UPLC-Q-TOF-MS |
| 35             | 4-Ethylphenyl sulfate | 0.05              | –              | 10                                     | Xe lamp              | 8         | UPLC-Q-TOF-MS |
| 36             | 4-Ethylphenyl sulfate | 0.05              | –              | 10                                     | dark                 | –         | UPLC-Q-TOF-MS |
| 37             | 4-Ethylphenyl sulfate | 0.05              | –              | –                                      | –                    | –         | UPLC-Q-TOF-MS |

|    |                       |     |   |    |         |   |             |
|----|-----------------------|-----|---|----|---------|---|-------------|
| 38 | 4-Ethylphenyl sulfate | 0.5 | – | 10 | Xe lamp | 3 | UPLC-PAD-MS |
| 39 | 4-Ethylphenyl sulfate | 0.5 | – | 10 | Xe lamp | 8 | UPLC-PAD-MS |
| 40 | 4-Ethylphenyl sulfate | 1   | – | 10 | Xe lamp | 3 | UV-vis, EEM |

**Table S2.** Products from liquid-phase  $\bullet\text{OH}$  oxidation of phenyl sulfate.

| <i>m/z</i><br>[M-H] | Error<br>(ppm) | Formula                                    | Structure                                                                             |
|---------------------|----------------|--------------------------------------------|---------------------------------------------------------------------------------------|
| 138.9711            | 3.114          | $\text{C}_2\text{H}_3\text{O}_5\text{S}^-$ |                                                                                       |
| 188.9864            | 0.438          | $\text{C}_6\text{H}_5\text{O}_5\text{S}^-$ | 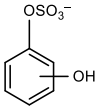   |
| 204.9813            | 0.332          | $\text{C}_6\text{H}_5\text{O}_6\text{S}^-$ |    |
| 208.9765            | 1.692          | $\text{C}_5\text{H}_5\text{O}_7\text{S}^-$ |                                                                                       |
| 220.9766            | 2.052          | $\text{C}_6\text{H}_5\text{O}_7\text{S}^-$ |  |
| 226.9869            | 0.832          | $\text{C}_5\text{H}_7\text{O}_8\text{S}^-$ |                                                                                       |
| 238.9866            | -0.465         | $\text{C}_6\text{H}_7\text{O}_8\text{S}^-$ |                                                                                       |
| 254.9811            | -2.062         | $\text{C}_6\text{H}_7\text{O}_9\text{S}^-$ |                                                                                       |
| 256.9971            | -0.684         | $\text{C}_6\text{H}_9\text{O}_9\text{S}^-$ |                                                                                       |

**Table S3.** Products from liquid-phase  $\bullet\text{OH}$  oxidation of p-tolyl sulfate.

| <i>m/z</i><br>[M-H] | Error<br>(ppm) | Formula                                    | Structure                                                                             |
|---------------------|----------------|--------------------------------------------|---------------------------------------------------------------------------------------|
| 192.9807            | -2.756         | $\text{C}_5\text{H}_5\text{O}_6\text{S}^-$ |                                                                                       |
| 200.9863            | -0.086         | $\text{C}_7\text{H}_5\text{O}_5\text{S}^-$ | 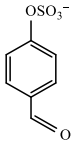   |
| 203.0020            | 0.161          | $\text{C}_7\text{H}_7\text{O}_5\text{S}^-$ |    |
| 208.9760            | -0.701         | $\text{C}_5\text{H}_5\text{O}_7\text{S}^-$ |                                                                                       |
| 216.9816            | 1.697          | $\text{C}_7\text{H}_5\text{O}_6\text{S}^-$ |                                                                                       |
| 218.9968            | -0.374         | $\text{C}_7\text{H}_7\text{O}_6\text{S}^-$ |  |
| 234.9917            | -0.411         | $\text{C}_7\text{H}_7\text{O}_7\text{S}^-$ |  |
| 253.0021            | -1.032         | $\text{C}_7\text{H}_9\text{O}_8\text{S}^-$ |                                                                                       |

**Table S4.** Products from liquid-phase  $\bullet\text{OH}$  oxidation of 4-ethylphenyl sulfate.

| $m/z$<br>[M-H] | Error<br>(ppm) | Formula                                       | Structure                                                                             |
|----------------|----------------|-----------------------------------------------|---------------------------------------------------------------------------------------|
| 196.9762       | 0.272          | $\text{C}_4\text{H}_5\text{O}_7\text{S}^-$    |                                                                                       |
| 200.9862       | -0.583         | $\text{C}_7\text{H}_5\text{O}_5\text{S}^-$    | 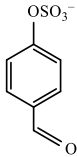   |
| 215.0013       | -3.104         | $\text{C}_8\text{H}_7\text{O}_5\text{S}^-$    |    |
| 217.0172       | -1.923         | $\text{C}_8\text{H}_9\text{O}_5\text{S}^-$    |   |
| 230.9961       | -3.385         | $\text{C}_8\text{H}_7\text{O}_6\text{S}^-$    |                                                                                       |
| 233.0120       | -2.283         | $\text{C}_8\text{H}_9\text{O}_6\text{S}^-$    |  |
| 246.9914       | -1.605         | $\text{C}_8\text{H}_7\text{O}_7\text{S}^-$    |                                                                                       |
| 249.0068       | -2.597         | $\text{C}_8\text{H}_9\text{O}_7\text{S}^-$    |  |
| 267.0173       | -2.664         | $\text{C}_8\text{H}_{11}\text{O}_8\text{S}^-$ |                                                                                       |

**Table S5.** Calculated lifetimes of OS via liquid-phase  $\bullet\text{OH}$  oxidation in different scenarios.

| Species                                | $k$ ( $\text{M}^{-1} \text{s}^{-1}$ ) | Aerosol |        | Cloud  |        | Reference                |
|----------------------------------------|---------------------------------------|---------|--------|--------|--------|--------------------------|
|                                        |                                       | Urban   | Remote | Urban  | Remote |                          |
| Phenyl sulfate                         | $5.1 \times 10^9$                     | 7 min   | 1 min  | 16 h   | 2 h    |                          |
| p-Tolyl sulfate                        | $5.4 \times 10^9$                     | 7 min   | 1 min  | 15 h   | 2 h    | This study               |
| 4-Ethylphenyl sulfate                  | $5.4 \times 10^9$                     | 7 min   | 1 min  | 15 h   | 2 h    |                          |
| Methyl sulfate                         | $1.05 \times 10^8$                    | 6 h     | 53 min | 32 day | 5 day  |                          |
| Ethyl sulfate                          | $3.93 \times 10^8$                    | 2 h     | 14 min | 8 day  | 1 day  | (Gweme and Styler, 2024) |
| Propyl sulfate                         | $1.22 \times 10^9$                    | 31 min  | 5 min  | 3 day  | 10 h   |                          |
| Hydroxyacetone sulfate                 | $1.52 \times 10^8$                    | 4 h     | 37 min | 22 day | 4 day  |                          |
| $\alpha$ -Pinene-derived organosulfate | $2.2 \times 10^9$                     |         | 3min   | 2 day  |        | (Lai et al, 2025)        |

$k$  value represents the average value under the pH 3 and pH 8 conditions in this study.

$\bullet\text{OH}$  concentrations are obtained from CAPRAM model (Herrmann et al., 2005, 2010).  $[\bullet\text{OH}]_{\text{urban aerosol}} = 4.4 \times 10^{-13} \text{M}$ ;  $[\bullet\text{OH}]_{\text{remote aerosol}} = 3.0 \times 10^{-12} \text{M}$ ;  $[\bullet\text{OH}]_{\text{urban cloud}} = 3.5 \times 10^{-15} \text{M}$ ;  $[\bullet\text{OH}]_{\text{remote cloud}} = 2.2 \times 10^{-14} \text{M}$ .

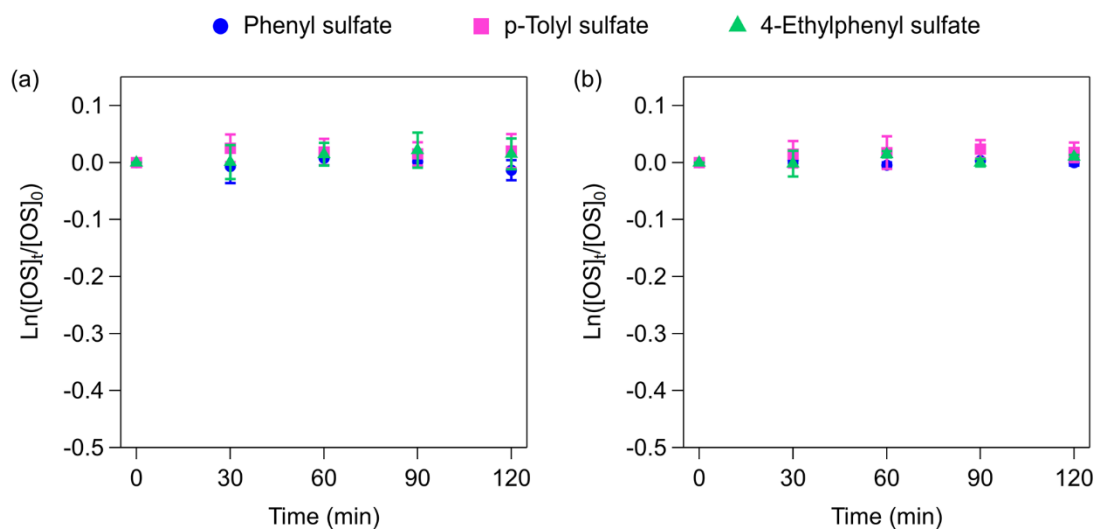

**Figure S1. Kinetics of aromatic OSs from control experiments performed at (a) pH 3 and (b) pH 8 under dark conditions.**

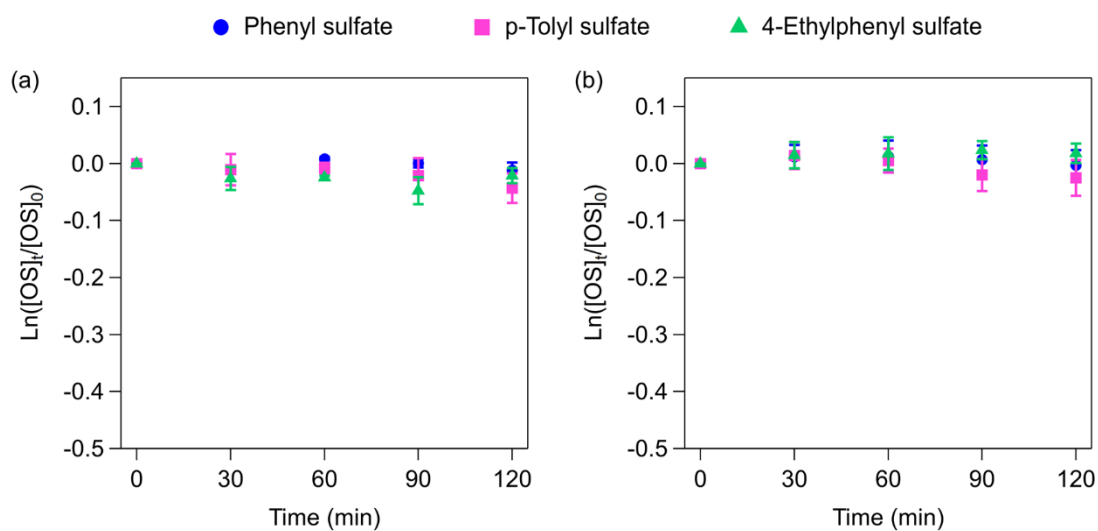

**Figure S2. Kinetics of aromatic OSs from control experiments performed at (a) pH 3 and (b) pH 8 under illumination in the absence of  $\text{H}_2\text{O}_2$ .**

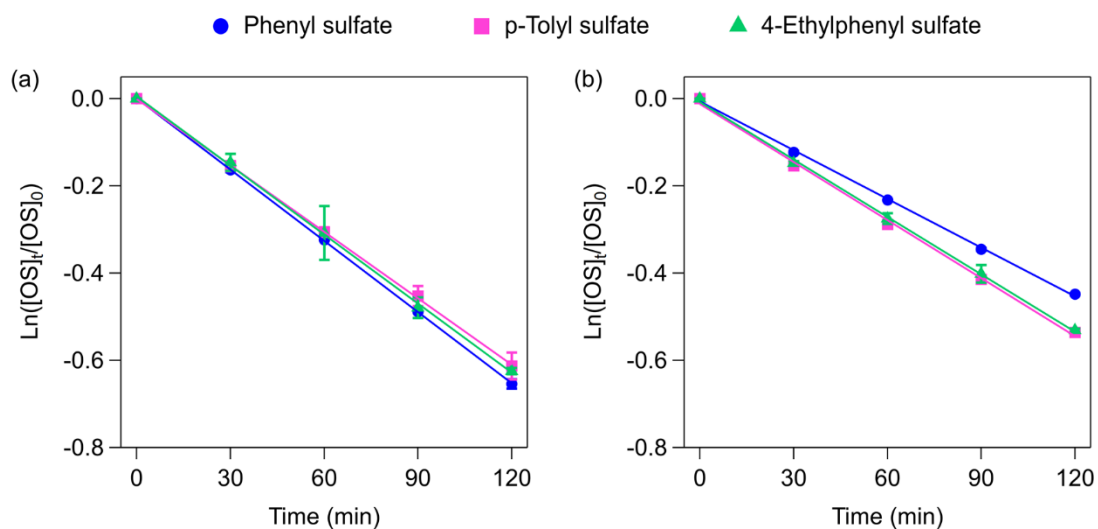

**Figure S3. Time dependence of aromatic OS consumption during the processes of  $\bullet\text{OH}$  oxidation at (a) pH 3 and (b) pH 8.**

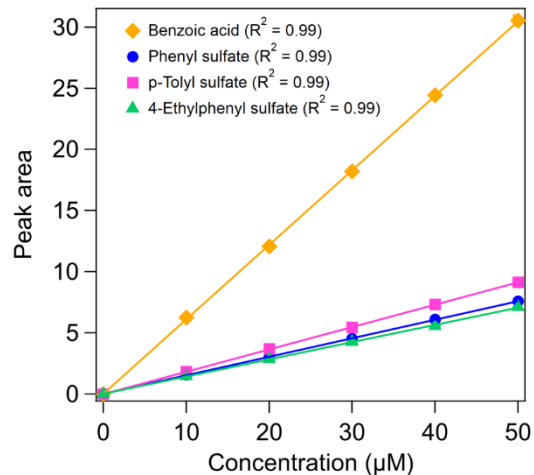

**Figure S4. Calibration curves of benzoic acid, phenyl sulfate, p-tolyl sulfate, and 4-ethylphenyl sulfate.**

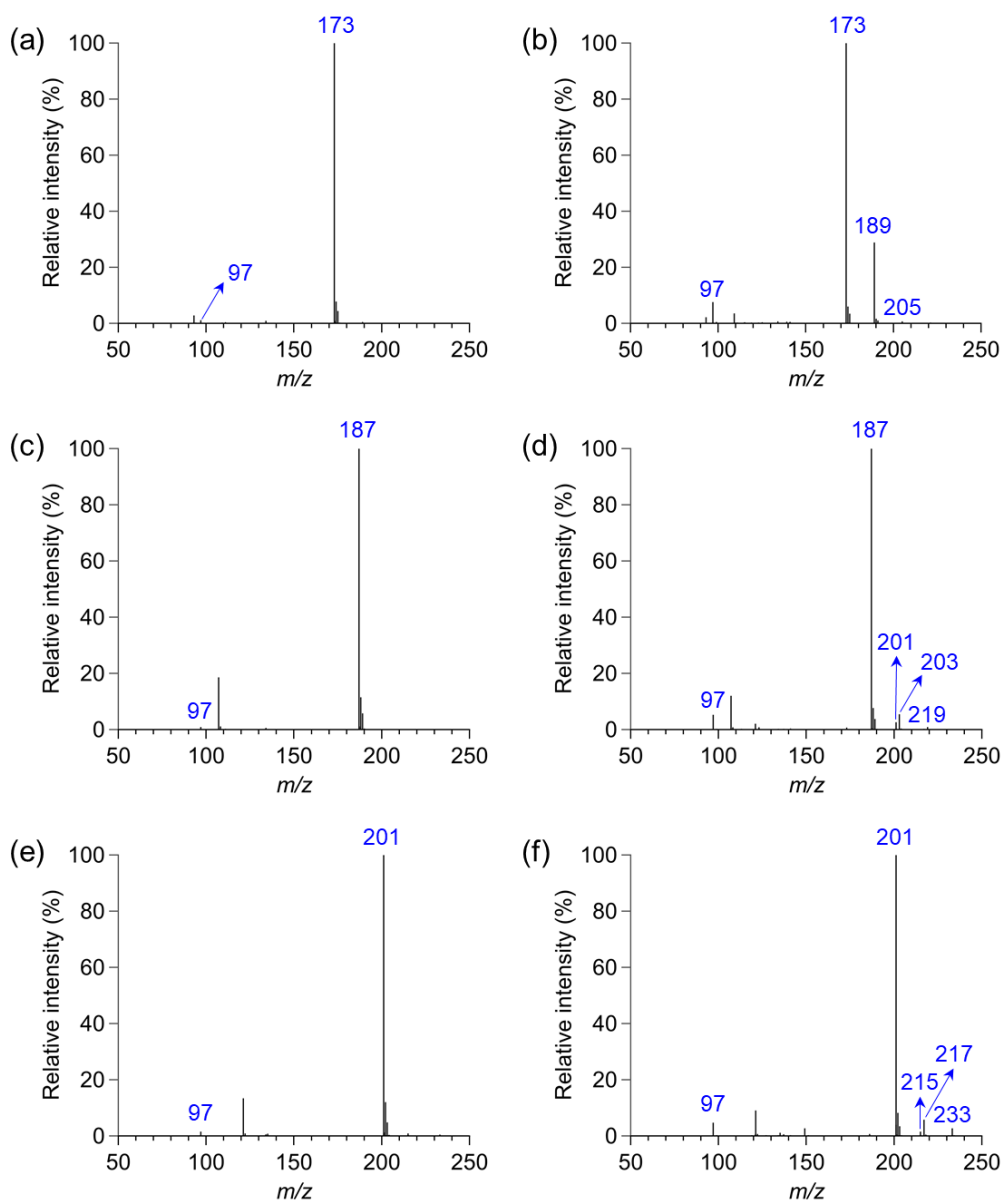

**Figure S5. Mass spectra collected from the liquid-phase reactions of 0.05 mM (a, b) phenyl sulfate, (c, d) p-tolyl sulfate, and (e, f) 4-ethylphenyl sulfate with 10 mM H<sub>2</sub>O<sub>2</sub> under dark (left panels) and illumination (right panels) conditions.**

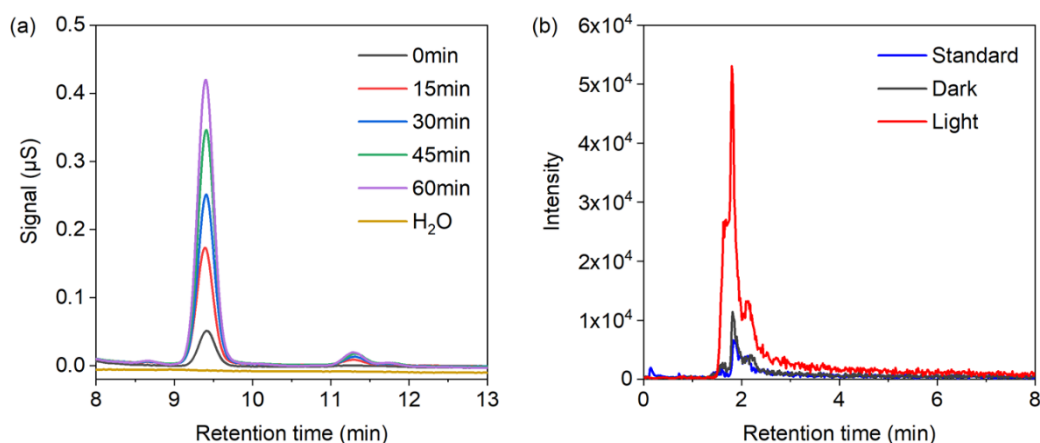

**Figure S6. (a)** Time profile of  $\text{SO}_4^{2-}$  peak in ion chromatograms (IC) in the reactions of 0.05 mM phenyl sulfate with  $\bullet\text{OH}$  at pH 3. **(b)** Extracted ion chromatogram (EIC) of  $\text{HSO}_4^-$  ( $m/z$  97) obtained from phenyl sulfate standard (blue line) and from their liquid-phase reactions under dark (black line) and illumination (red line) conditions.

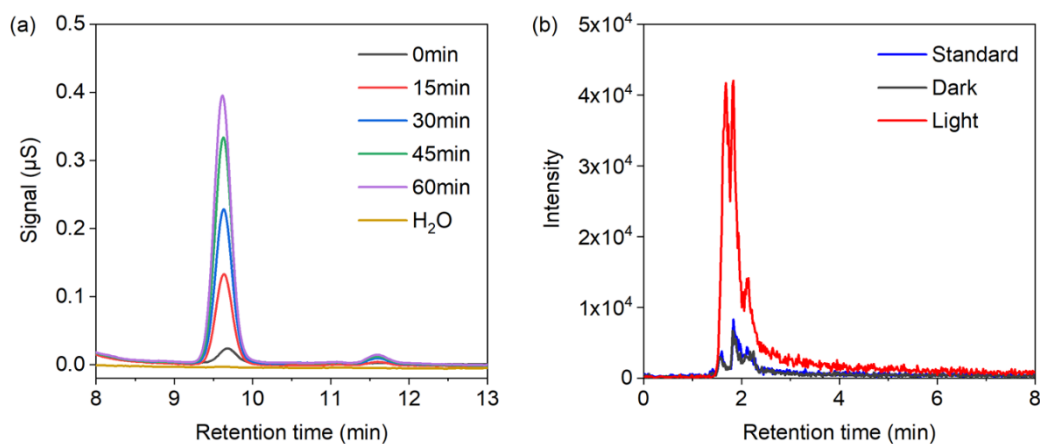

**Figure S7. (a)** Time profile of  $\text{SO}_4^{2-}$  peak in ion chromatograms (IC) in the reactions of 0.05 mM p-tolyl sulfate with  $\bullet\text{OH}$  at pH 3. **(b)** Extracted ion chromatogram (EIC) of  $\text{HSO}_4^-$  ( $m/z$  97) obtained from p-tolyl sulfate standard (blue line) and from their liquid-phase reactions under dark (black line) and illumination (red line) conditions.

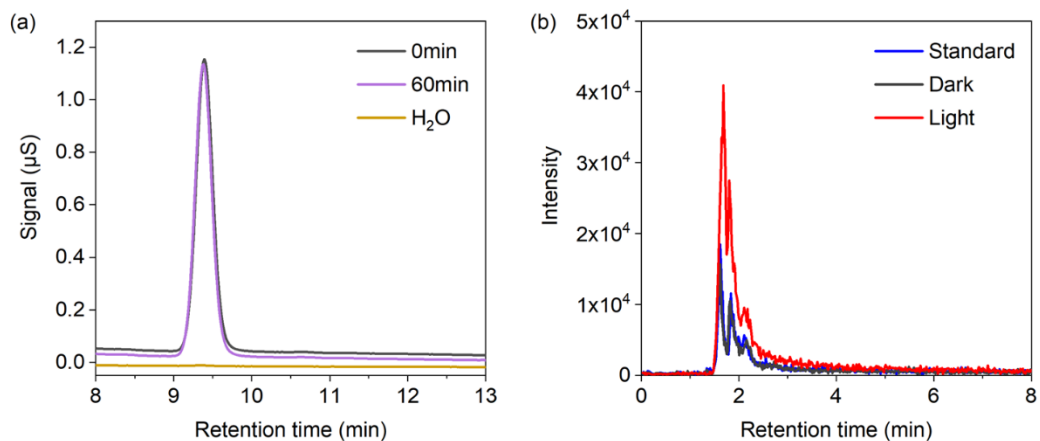

**Figure S8. (a)** Time profile of  $\text{SO}_4^{2-}$  peak in ion chromatograms (IC) in the reactions of 0.05 mM 4-ethylphenyl sulfate with  $\bullet\text{OH}$  at pH 3. **(b)** Extracted ion chromatogram (EIC) of  $\text{HSO}_4^-$  ( $m/z$  97)

obtained from 4-ethylphenyl sulfate (blue line) and from their liquid-phase reactions under dark (black line) and illumination (red line) conditions.

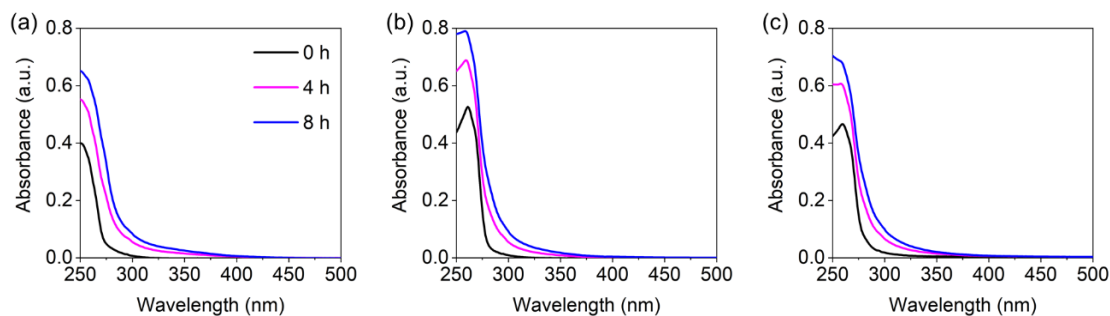

Figure S9. Time profile of UV-vis light absorption spectra during the liquid-phase  $\bullet\text{OH}$  oxidation of (a) phenyl sulfate, (b) p-tolyl sulfate and (c) 4-ethylphenyl sulfate at pH 3.

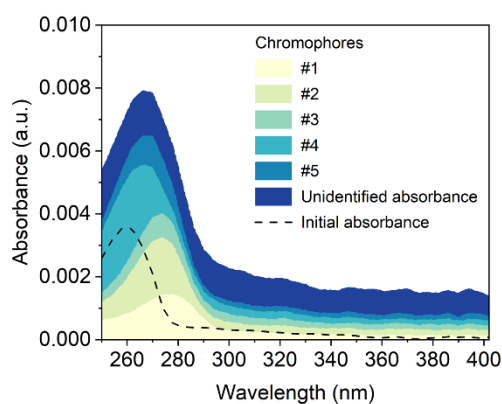

Figure S10. Contributions of the main absorbing chromophores to the total light absorption from the liquid-phase reactions of phenyl sulfate with  $\bullet\text{OH}$  at pH 3. The dotted line indicates the initial absorbance of phenyl sulfate at pH 3.

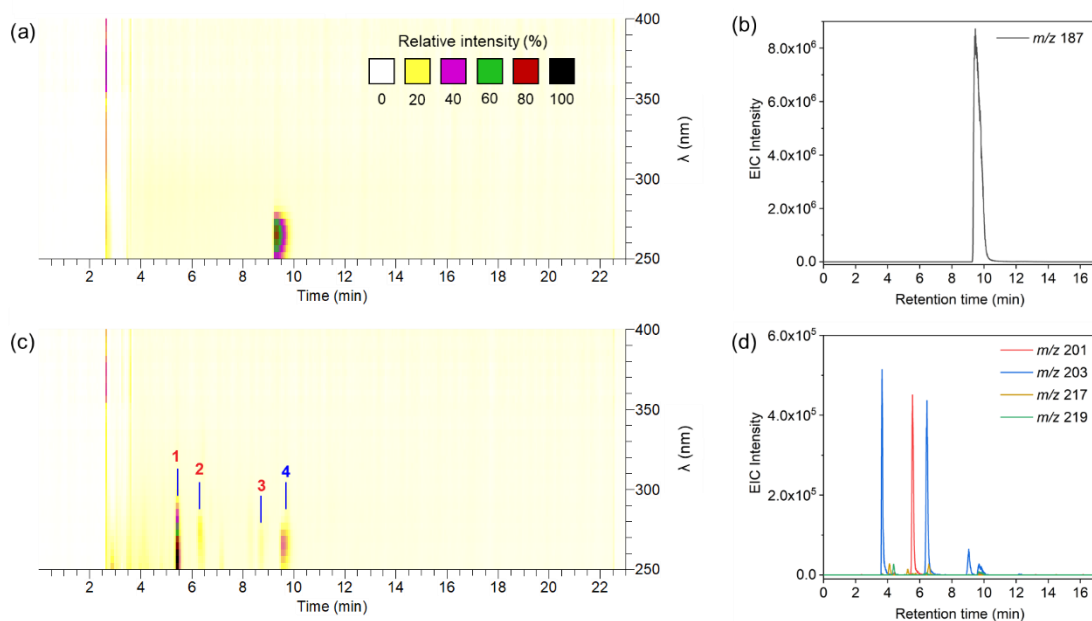

Figure S11. UPLC-PAD-MS chromatograms of samples collected (a) before and (c) after the liquid-

phase  $\bullet\text{OH}$  oxidation of p-tolyl sulfate at pH 3. The y-axis and color map represent the wavelength and corresponding UV-vis absorbance, respectively. Extracted ion chromatograms (EIC) of (b) p-tolyl sulfate and (d) the compositions of chromophores.

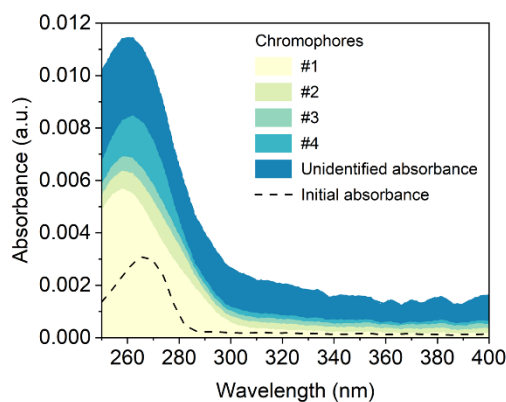

Figure S12. Contributions of the main absorbing chromophores to the total light absorption from the liquid-phase reactions of p-tolyl sulfate with  $\bullet\text{OH}$  at pH 3. The dotted line indicates the initial absorbance of p-tolyl sulfate at pH 3.

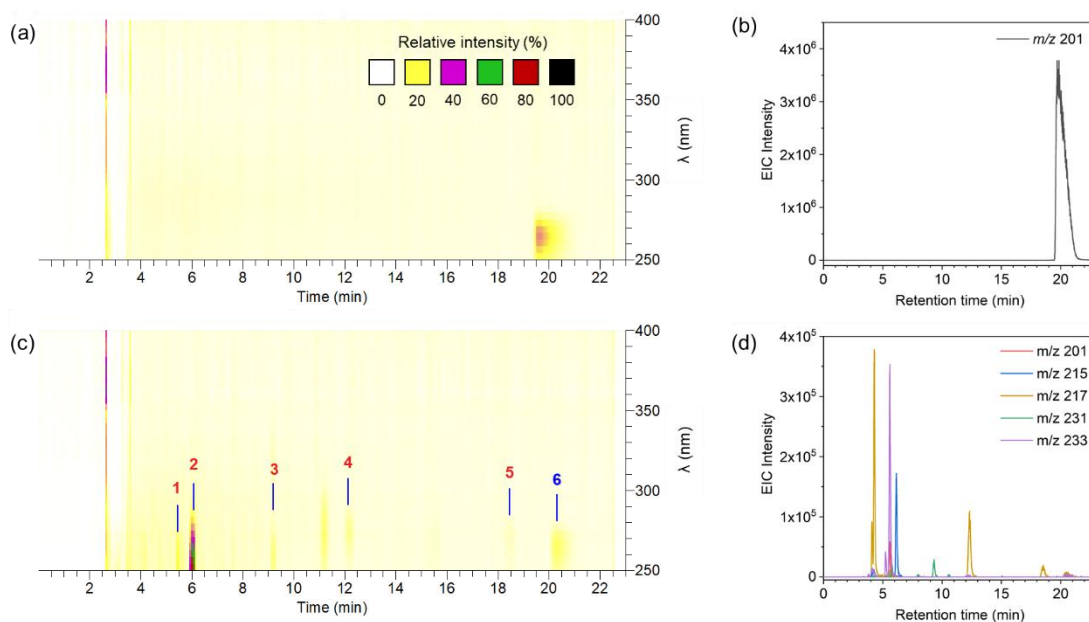

Figure S13. UPLC-PAD-MS chromatograms of samples collected (a) before and (c) after the liquid-phase  $\bullet\text{OH}$  oxidation of 4-ethylphenyl sulfate at pH 3. The y-axis and color map represent the wavelength and corresponding UV-vis absorbance, respectively. Extracted ion chromatograms (EIC) of (b) 4-ethylphenyl sulfate and (d) the compositions of chromophores.

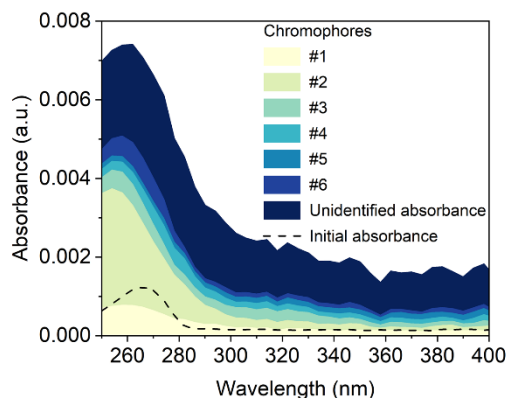

**Figure S14.** Contributions of the main absorbing chromophores to the total light absorption from the liquid-phase reactions of 4-ethylphenyl sulfate with  $\bullet\text{OH}$  at pH 3. The dotted line indicates the initial absorbance of 4-ethylphenyl sulfate at pH 3.

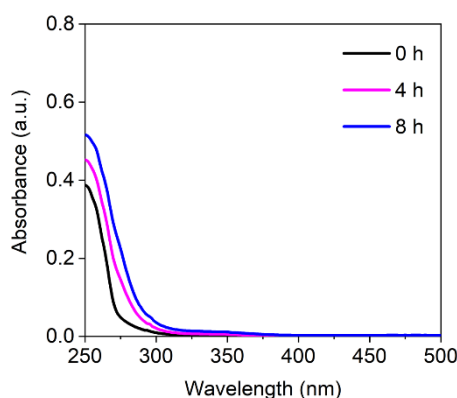

**Figure S15.** Time profile of UV-vis light absorption spectra during the process of phenyl sulfate reacting with  $\bullet\text{OH}$  at pH 8.

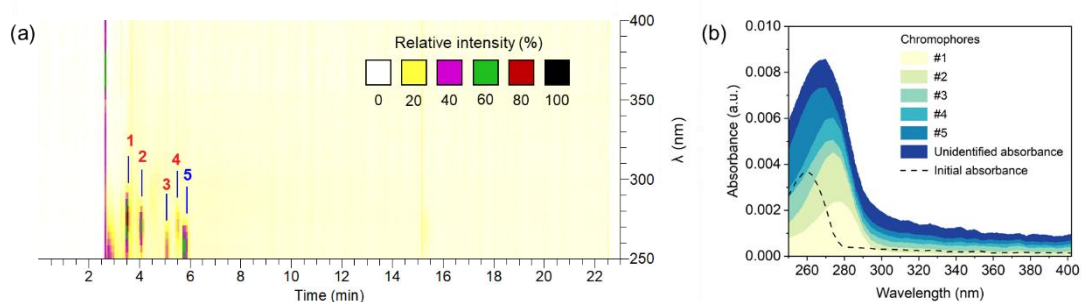

**Figure S16.** UPLC-PAD-MS chromatograms of sample collected (a) after the liquid-phase  $\bullet\text{OH}$  oxidation of phenyl sulfate at pH 8. The y-axis and color map represent the wavelength and corresponding UV-vis absorbance, respectively. (b) Relative contribution of the main absorbing chromophores to the total light absorption from the liquid-phase reaction of phenyl sulfate with  $\bullet\text{OH}$  at pH 8. The dotted line represents the initial absorbance of phenyl sulfate.

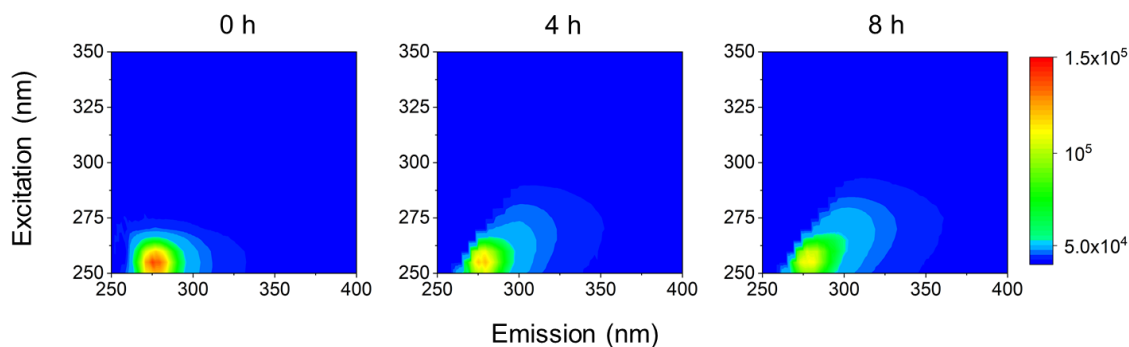

**Figure S17. Time profile of excitation-emission matrix (EEM) fluorescence spectra during the process of phenyl sulfate reacting with  $\bullet\text{OH}$  at pH 8.**

## References

- Gweme, D. T., and Styler, S. A.: OH radical oxidation of organosulfates in the atmospheric aqueous phase, *J. Phys. Chem. A*, 128, 9462–9475, <https://doi.org/10.1021/acs.jpca.4c02877>, 2024.
- Herrmann, H., Tilgner, A., Barzaghi, P., Majdik, Z., Gligorovski, S., Poulain, L., and Monod, A.: Towards a more detailed description of tropospheric aqueous phase organic chemistry: CAPRAM 3.0, *Atmos. Environ.*, 39, 4351–4363, <https://doi.org/10.1016/j.atmosenv.2005.02.016>, 2005.
- Herrmann, H., Hoffmann, D., Schaefer, T., Bräuer, P., and Tilgner, A.: Tropospheric aqueous-phase free-radical chemistry: Radical sources, spectra, reaction kinetics and prediction tools, *Chem. Phys. Chem.*, 11, 3796–3822, <https://doi.org/10.1002/cphc.201000533>, 2010.
- Lai, D., Bai, Y., Zhang, Z., So, P.-K., Li, Y. J., Tse, Y.-L. S., Yeung, Y.-Y., Schaefer, T., Herrmann, H., Yu, J. Z., Wang, Y., and Chan, M. N.: Rapid aqueous-phase oxidation of an  $\alpha$ -pinene-derived organosulfate by hydroxyl radicals: a potential source of some unclassified oxygenated and small organosulfates in the atmosphere, *Atmos. Chem. Phys.*, 25, 12569–12584, <https://doi.org/10.5194/acp-25-12569-2025>, 2025.
